CORRECTION

# Correction: A Unique Human Norovirus Lineage with a Distinct HBGA Binding Interface

Wu Liu, Yutao Chen, Xi Jiang, Ming Xia, Yang Yang, Ming Tan, Xuemei Li, Zihe Rao

The following information is missing from the Funding section: This study was supported by the External Cooperation Program of the Chinese Academy of Sciences (Grant No. GJHZ1405).

## Reference

1. Liu W, Chen Y, Jiang X, Xia M, Yang Y, Tan M, et al. (2015) A Unique Human Norovirus Lineage with a Distinct HBGA Binding Interface. PLoS Pathog 11(7): e1005025. doi: [10.1371/journal.ppat.1005025](https://doi.org/10.1371/journal.ppat.1005025) PMID: [26147716](https://pubmed.ncbi.nlm.nih.gov/26147716/)

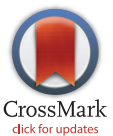

## OPEN ACCESS

**Citation:** Liu W, Chen Y, Jiang X, Xia M, Yang Y, Tan M, et al. (2016) Correction: A Unique Human Norovirus Lineage with a Distinct HBGA Binding Interface. PLoS Pathog 12(4): e1005599. doi:10.1371/journal.ppat.1005599

**Published:** April 19, 2016

**Copyright:** © 2016 Liu et al. This is an open access article distributed under the terms of the [Creative Commons Attribution License](https://creativecommons.org/licenses/by/4.0/), which permits unrestricted use, distribution, and reproduction in any medium, provided the original author and source are credited.
